# Supplementary material for: Biomineralization-inspired crystallization of monodisperse α-Mn2O3 octahedra and assembly of high-capacity lithium-ion battery anodes
Source: Royal Society of Chemistry journal article supplement (doi:10.1039/c6ta11243a), 2017-01-01
Supplement: c6ta11243a1.pdf [file c6ta11243a1.pdf]

## Biomimetalization-Inspired Crystallization of Monodisperse $\alpha$ - $Mn_2O_3$ Octahedra and Assembly of High-Capacity Lithium-ion Battery Anodes

Received 00th January 20xx,  
Accepted 00th January 20xx

DOI: 10.1039/x0xx00000x

www.rsc.org/

Joel Henzie,<sup>\*a</sup> Vinodkumar Etacheri,<sup>b</sup> Maryam Jahan,<sup>a</sup> Hongpan Rong,<sup>a</sup> Chulgi Nathan Hong,<sup>b</sup> Vilas G. Pol<sup>\*</sup>

### Contents

- Figure S1.** *Selected area electron diffraction pattern of an  $\alpha$ - $Mn_2O_3$  octahedron tilted and oriented along the [110] direction.*
- Figure S2.** *Solvothermal experiments conducted at lower temperatures show the phase of the material transforms from  $Mn(HCOO)_3[(CH_3)_2NH_2] \rightarrow Mn_3O_4 \rightarrow \alpha$ - $Mn_2O_3$ .*
- Figure S3.** *Experiments show that PVP was essential to the reaction and omission of PVP yielded  $Mn(HCOO)_3[(CH_3)_2NH_2]$  metal organic frameworks (MOFs).*
- Figure S4.** *Colorimetric measurements show the importance of the pyrrolidone moiety in the standard reaction heated to  $t = 151^\circ C$  in an open vial.*
- Figure S5.** *Colorimetric measurements show the importance of the PVP microstructure in the standard reaction heated to  $t = 151^\circ C$  in an open vial.*
- Figure S6.** *Moiré images of a  $Mn_3O_4$  tetrahedral bipyramid shows it is single crystalline*
- Figure S7.** *Comparison of theoretical specific surface area ( $cm^3/gram$ ) of perfect  $\alpha$ - $Mn_2O_3$  octahedra versus measured  $S_{BET}$  of the as-synthesized samples.*
- Figure S8.** *First charge-discharge cycle of LIB battery anodes composed of  $\alpha$ - $Mn_2O_3$  octahedral nanoparticles.*
- Table S1.**

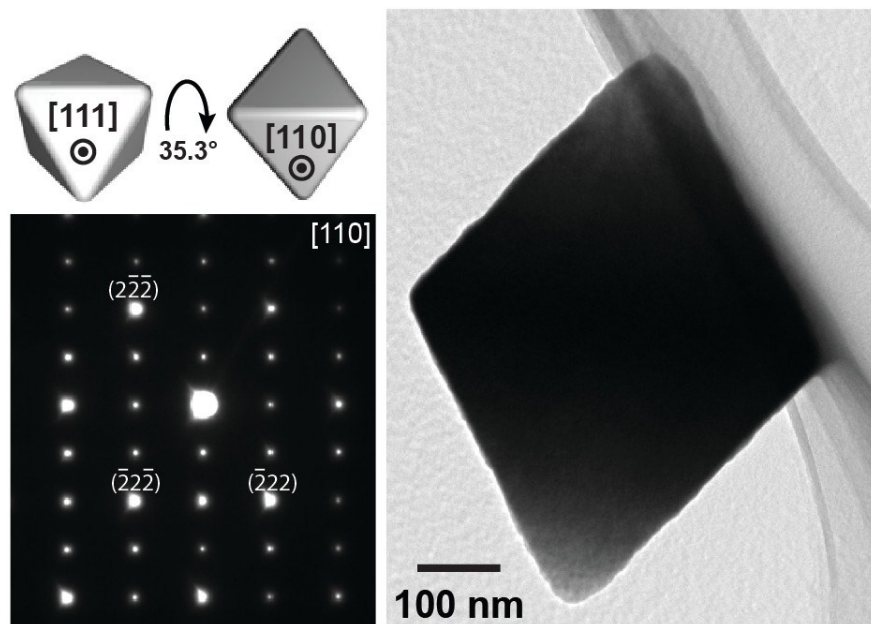

**Figure S1.** The  $\alpha$ - $\text{Mn}_2\text{O}_3$  octahedra were tilted in the TEM to observe the crystal along the  $[110]$  direction. The whole particle was imaged by TEM and the collected SAED pattern showed the particle was single crystal and no noticeable unrelated crystallites are present.

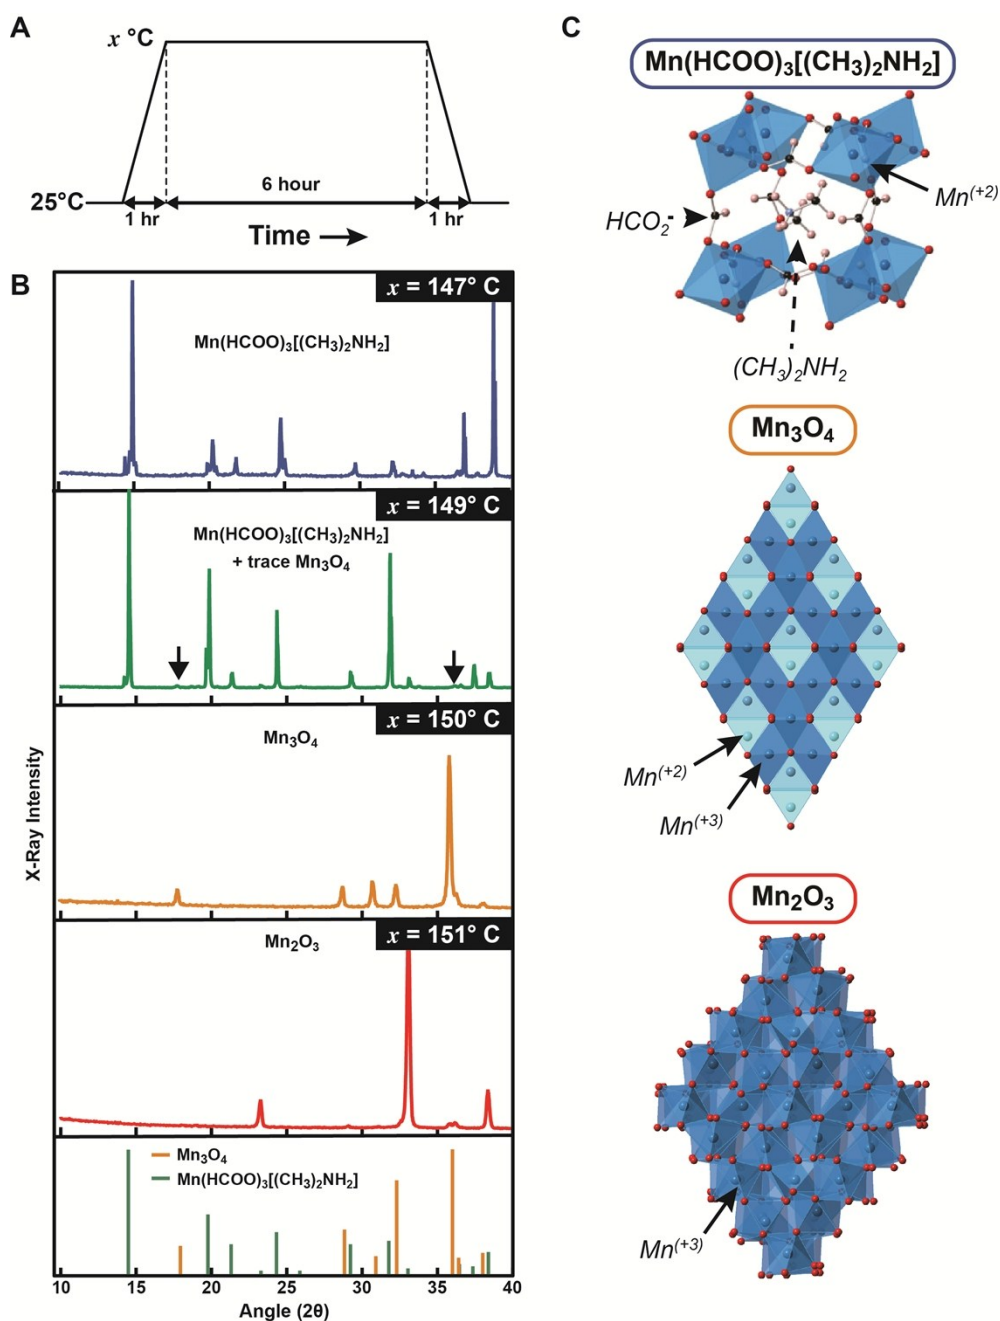

**Figure S2.** Solvothermal experiments conducted at lower temperatures show the phase of the material transforms from  $\text{Mn}(\text{HCOO})_3[(\text{CH}_3)_2\text{NH}_2] \rightarrow \text{Mn}_3\text{O}_4 \rightarrow \alpha\text{-Mn}_2\text{O}_3$ . All solvothermal experiments were conducted using a 1-hour ramp from room temperature to  $x^{\circ}\text{C}$ , followed by a 6-hour soak at constant temperature  $x^{\circ}\text{C}$ , followed by a 1-hour ramp down to room temperature (A). Samples generated by this solvothermal method were conducted at different soak temperatures from  $x=147, 149, 150,$  and  $151^{\circ}\text{C}$  and measured by PXRD (B). At  $x=147^{\circ}\text{C}$   $\text{Mn}(\text{HCOO})_3[(\text{CH}_3)_2\text{NH}_2]$  metal organic frameworks (MOFs) is generated almost exclusively. As temperature is increased to  $x=149^{\circ}\text{C}$  we can see the emergence of  $\text{Mn}_3\text{O}_4$  (see black arrows), which becomes the primary phase at  $x=150^{\circ}\text{C}$ . Above  $x=151^{\circ}\text{C}$  and extending to  $180^{\circ}\text{C}$  we observed  $\alpha\text{-Mn}_2\text{O}_3$  exclusively. The models show the structural relationship between  $\text{Mn}(\text{HCOO})_3[(\text{CH}_3)_2\text{NH}_2]$ ,  $\text{Mn}_3\text{O}_4$ , and  $\alpha\text{-Mn}_2\text{O}_3$  (C).

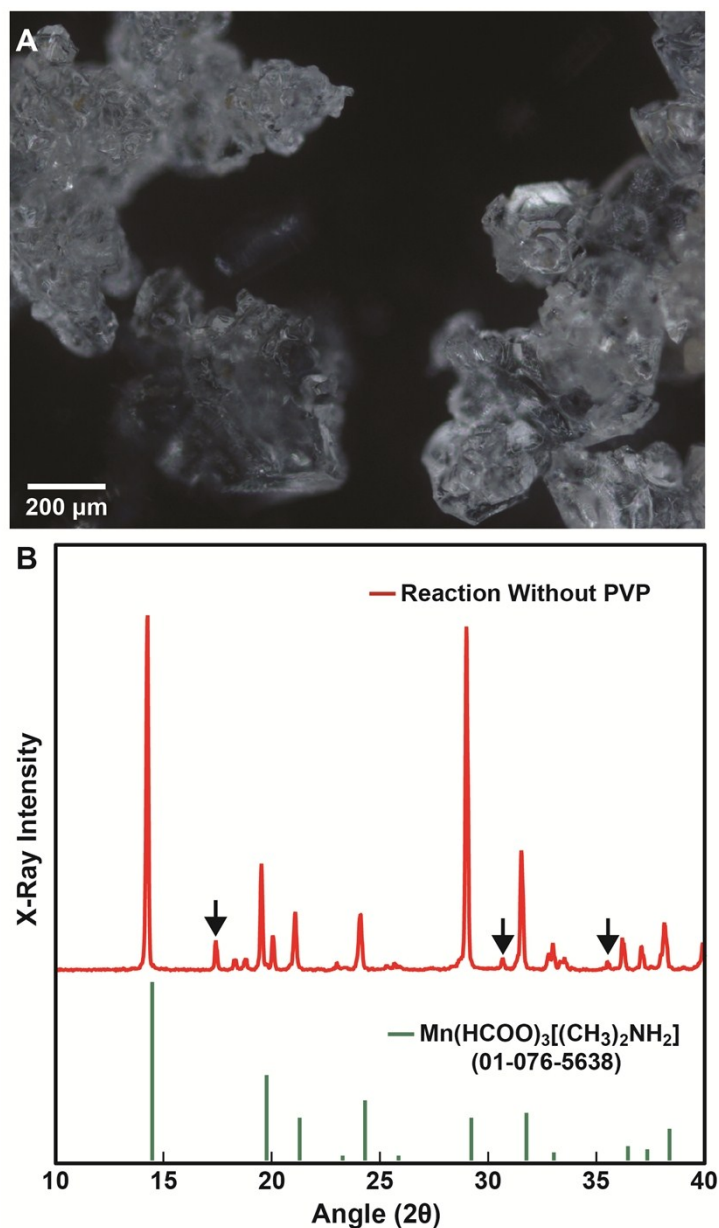

**Figure S3.** Experiments show that PVP was essential to the reaction and omission of PVP yielded  $\text{Mn}(\text{HCOO})_3[(\text{CH}_3)_2\text{NH}_2]$  metal organic frameworks (MOFs). The solvothermal reaction was performed without PVP polymer (ie. 4.81 mL of aqueous 50%  $\text{Mn}(\text{NO}_3)_2$  in 35 mL of DMF) at  $t = 180^\circ\text{C}$ . Omission of PVP yields multiferroic  $\text{Mn}(\text{HCOO})_3[(\text{CH}_3)_2\text{NH}_2]$  MOF microcrystals. (A) An optical micrograph of the MOF microcrystals. (B) PXRD pattern showing the MOF crystals conform closely to the predicted structure for  $\text{Mn}(\text{HCOO})_3[(\text{CH}_3)_2\text{NH}_2]$  MOF. The black arrows indicate peaks that correspond to an  $\text{Mn}_3\text{O}_4$  impurity.

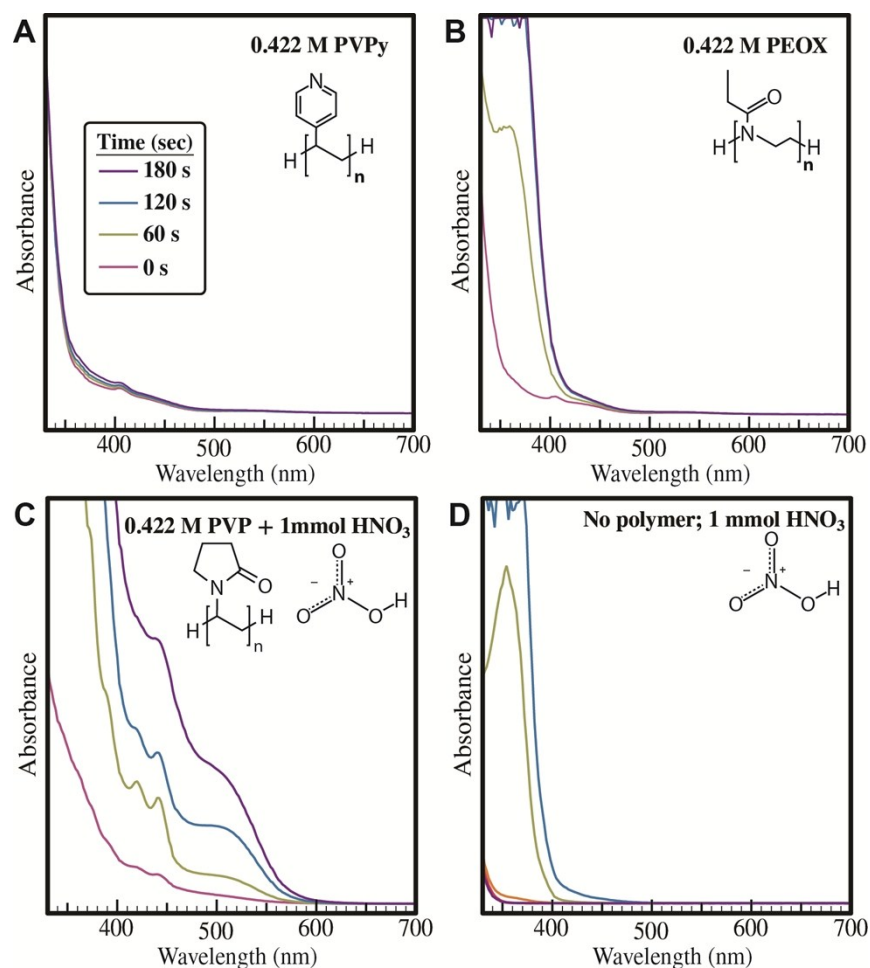

**Figure S4.** Colorimetric measurements show the importance of the pyrrolidone moiety in the standard reaction heated to  $t = 151^\circ\text{C}$  in an open vial for different times. (A) 4.81 mL of aqueous 50%  $\text{Mn}(\text{NO}_3)_2$  was mixed with 0.422 M of poly(4-vinylpyridine) (PVPy;  $M_w \sim 60\text{K}$ ) in 35 mL of DMF. (B) 4.81 mL of aqueous 50%  $\text{Mn}(\text{NO}_3)_2$  was mixed with 0.422 M of polyethyloxazoline (PEOX;  $M_w \sim 50\text{K}$ ) in 35 mL of DMF. (C) 4.81 mL of aqueous 50%  $\text{Mn}(\text{NO}_3)_2$  was mixed with 0.422 M of PVP in 35 mL of DMF + 1 millimole of nitric acid ( $\text{HNO}_3$ ). (D) 4.81 mL of aqueous 50%  $\text{Mn}(\text{NO}_3)_2$  was mixed with 35 mL of DMF + 1 millimole of nitric acid ( $\text{HNO}_3$ ). Samples were collected at different times (ie. 0, 60, 120 and 180 seconds) and measured with a UV-Vis spectrophotometer.

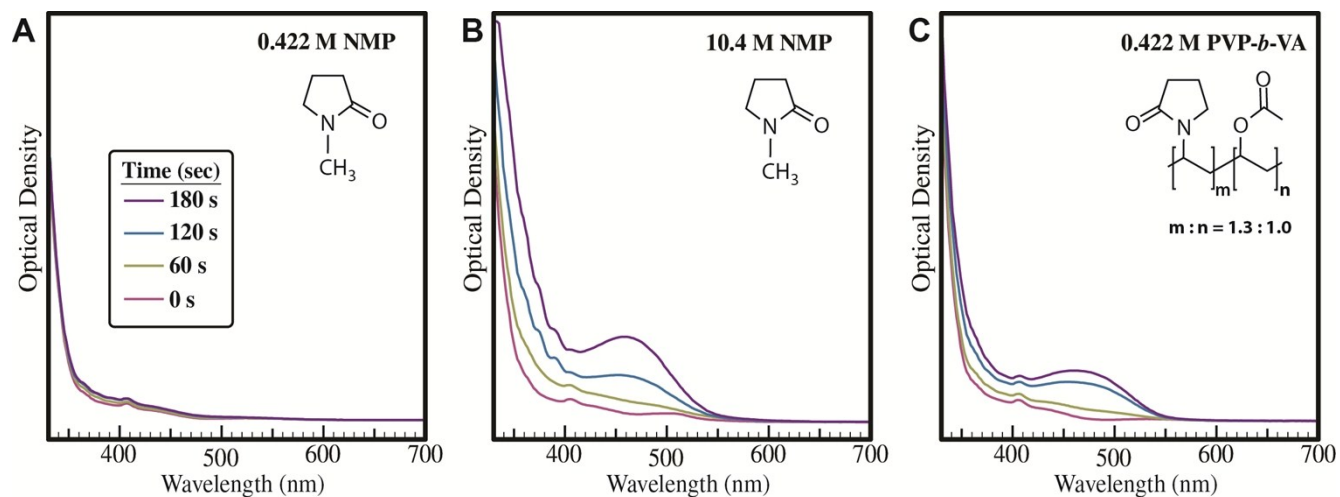

**Figure S5.** Colorimetric measurements show the importance of the PVP microstructure in the standard reaction heated to  $t = 151^\circ\text{C}$  in an open vial for different times. (A) 4.81 mL of aqueous 50%  $\text{Mn}(\text{NO}_3)_2$  was mixed with 0.422 M NMP in 35 mL of DMF. (B) 4.81 mL of aqueous 50%  $\text{Mn}(\text{NO}_3)_2$  was mixed with 35 mL of neat NMP (ie. 10.4 M). (C) 4.81 mL of aqueous 50%  $\text{Mn}(\text{NO}_3)_2$  was mixed with 0.422 M PVP-*b*-VA in 35 mL of DMF. The figure legend in (A) corresponds to all panels. Samples were collected at different times (ie. 0, 60, 120 and 180 seconds) and measured with a UV-Vis spectrophotometer.



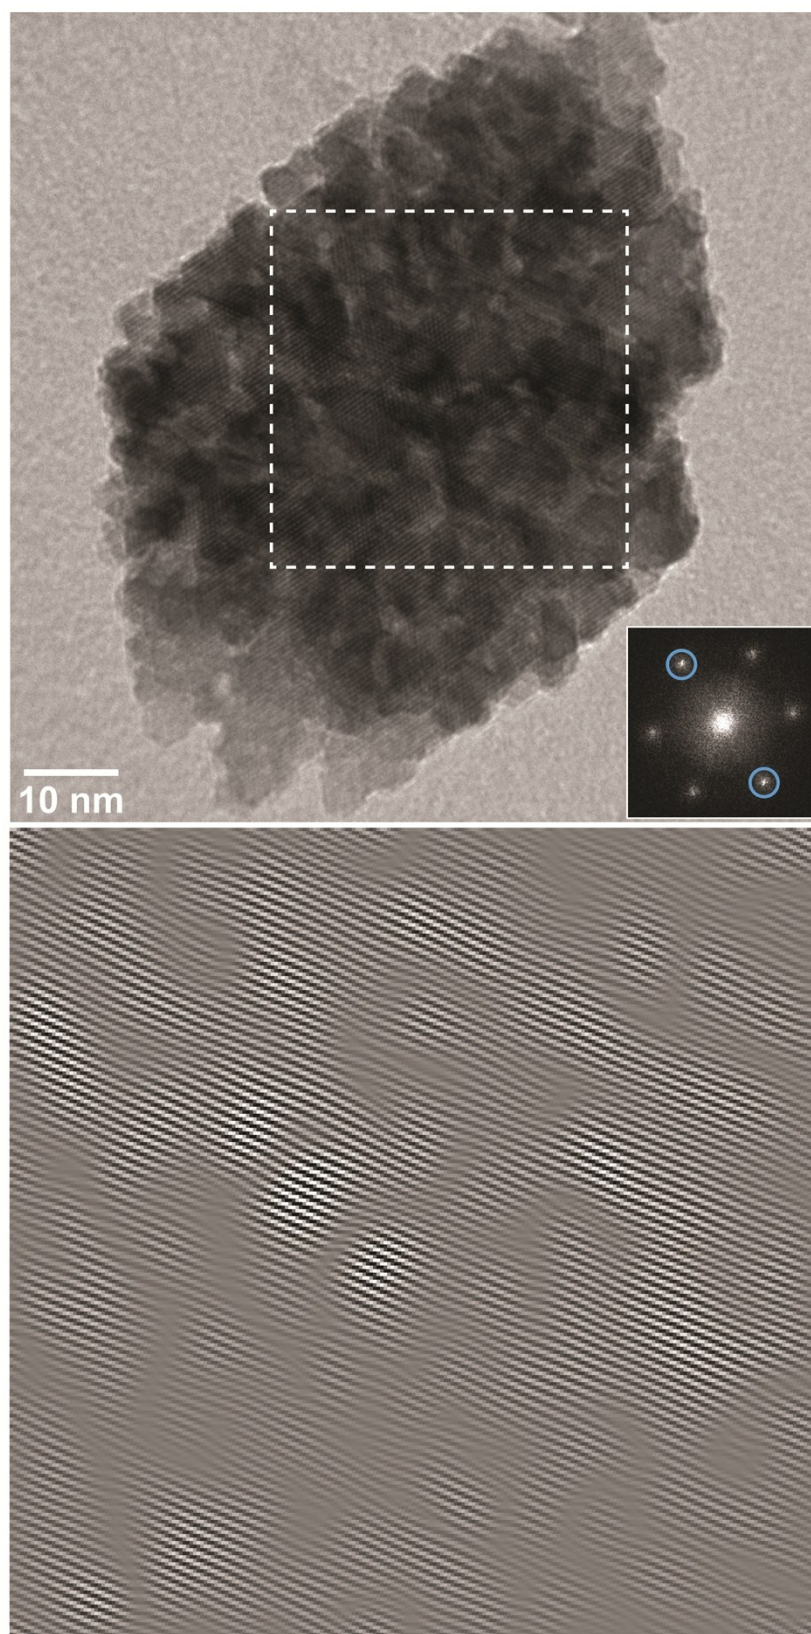

**Figure S6.** The  $(101)$  and  $(\bar{1}0\bar{1})$  reflections from the Fourier transform of the HRTEM image (Top) were used to construct a moiré image (Bottom). It shows variations in intensity shows that the particle is initially quite porous yet it is still crystalline with a coherent lattice extending across the entire particle and forming a coherent single-crystalline unit.

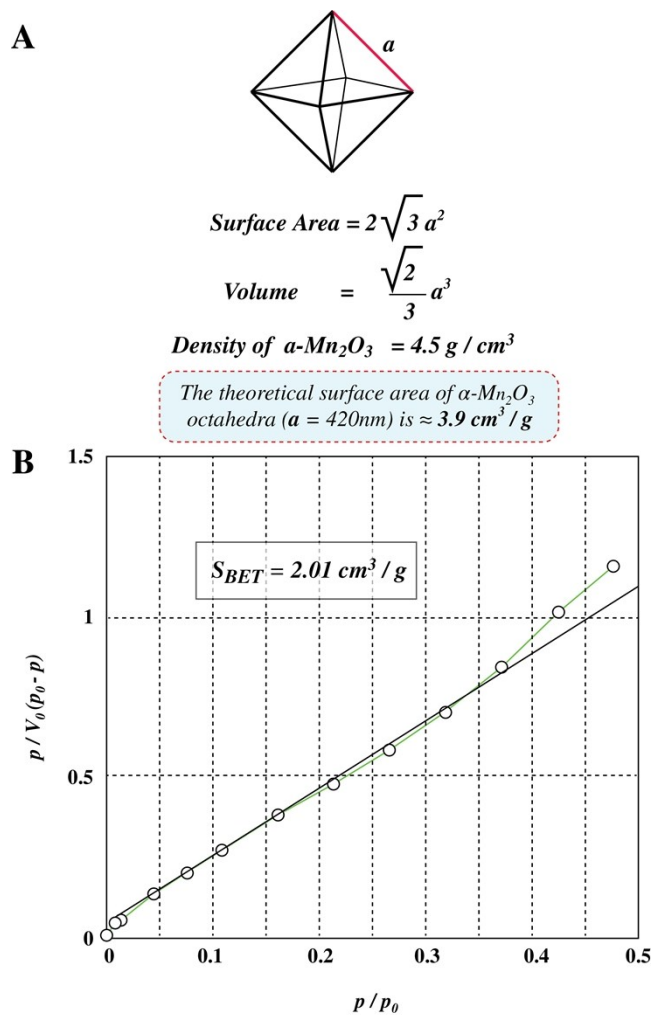

**Figure S7.** An ensemble of  $\alpha\text{-Mn}_2\text{O}_3$  octahedra with edge lengths of  $a = 420 \text{ nm}$  would have a surface area per gram ( $\text{cm}^3/\text{gram}$ ) of  $\sim 3.9$  assuming the particle is non-porous and its surface is perfectly flat (**A**). The  $\text{N}_2$  adsorption isotherm was linear between  $0.05 < p/p_0 < 0.35$  for the as-synthesized  $\alpha\text{-Mn}_2\text{O}_3$  octahedra with an  $S_{\text{BET}}$  of  $\sim 2.01 \text{ cm}^3/\text{gram}$  (**B**).



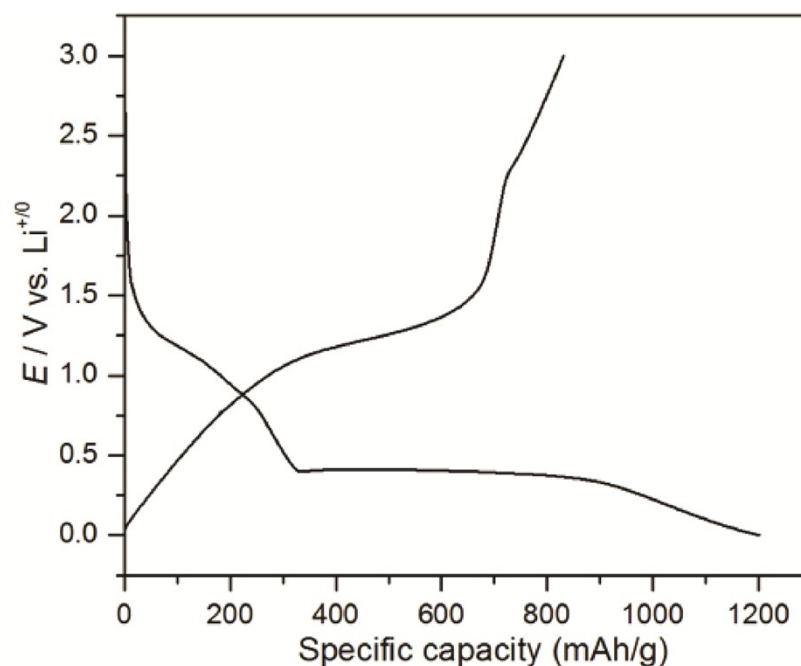

**Figure S8.** First charge-discharge cycle of LIB battery anodes composed of  $\alpha$ - $\text{Mn}_2\text{O}_3$  octahedral nanoparticles.

| Work                                    | Rate performance                     | Cycling stability      | Coulombic efficiency |
|-----------------------------------------|--------------------------------------|------------------------|----------------------|
| Octahedral single crystals (This study) | 435 mAh/g at 3.2 A/g current density | 90% after 100 cycles   | 99.5                 |
| Nanowires (ref 1)                       | 235 mAh/g at 1 A/g                   | 100 % after 100 cycles | 98%                  |
| Hollow spheres (ref 2)                  | 422 mAh/g at 1.6 A/g                 | 75% after 100 cycles   | 99.7                 |
| Hierarchical microspheres (ref 3)       | 400 mAh/g at 1.6 A/g                 | 50% after 50 cycles    | Unknown              |

**Table S1.** Comparison of rate performance, cycling stability, and Coulombic efficiency of this study to similar work.

### References:

1. Y. Wang, Y. Wang, D. Jia, Z. Peng, Y. Xia and G. Zheng, *Nano Lett.*, 2014, **14**, 1080–1084

2. H. Su, Y.-F. Xu, S.-C. Feng, Z.-G. Wu, X.-P. Sun, C.-H. Shen, J.-Q. Wang, J.-T. Li, L. Huang and S.-G. Sun, *ACS Appl. Mater. Interfaces*, 2015, **7**, 8488–8494
3. L. Hu, Y. Sun, F. Zhang and Q. Chen, *J. Alloys Compd.*, 2013, **576**, 86–92
